# Supplementary material for: Hepatocytic parental progenitor cells of rat small hepatocytes maintain self-renewal capability after long-term culture
Source: PubMed Central journal article supplement (PMC5387414; doi:10.1038/srep46177), 2017-04-11
Supplement: srep46177-s1.pdf [file srep46177-s1.pdf]

**Hepatocytic parental progenitor cells of rat small hepatocytes maintain self-renewal capability after long-term culture**

Masayuki Ishii, Jun-ichi Kino, Norihisa Ichinohe, Naoki Tanimizu, Takafumi Ninomiya, Hiromu Suzuki, Toru Mizuguchi, Koichi Hirata, Toshihiro Mitaka.

## **Supplemental Figure Legends**

### **Supplemental Figure S1**

Matrigel dependency of CD44<sup>+</sup> SH growth. Matrigel<sup>®</sup> (10 mg/mL) was diluted into the culture medium. Colonies with more than 10 cells were counted.

### **Supplemental Figure S2**

The ploidy of the first-passaged CD44<sup>+</sup> SHs cultured for 28 days was examined by flow cytometry. The fraction of single cells was separated from the fraction of cells with dense cytoplasm. Diploid (2n), tetraploid (4n), and octaploid (8n) cells are shown.

### **Supplemental Figure S3**

Experimental design of cell passages.

### **Supplemental Figure S4**

Phase-contrast photographs of typical colonies showing various types of morphology in each passage at 14 (1–3) and 21 days (4–9) after plating. Photos in each passage (1–3) show the typical morphology of colonies with high growth activity. The colonies have a relatively round shape, and contain homogeneously small-sized, polygonal, and mononuclear cells. The size of each cell gradually increases with each passage. Over time, colonies with irregular shapes that consist of cells with a relatively large cytoplasm (4–9) appear in culture. These colonies include some binucleate cells, but cells with multinuclei were rarely observed. Scale bars = 100  $\mu$ m.

### **Supplemental Figure S5**

Reproducibility of colony formation was confirmed. Three independent experiments were performed, and the colony-formation capability of CD44<sup>+</sup> SHs was analyzed by counting the number of cells after 14 days in culture. The distribution of colony sizes was not different among experiments up to the second passage, but a difference in the number of colonies with high growth activity appeared after the third passage.

### **Supplemental Figure S6**

(A) Based on the data shown in (B), a formula of exponential approximation was calculated to estimate the number of divisions within 28 days for each passage. (B) To establish linear equations for each passage, the mathematical expression was converted to a logarithmic scale.

The average number of cell divisions over 28 days is 13.5, 12.7, 11.0, and 9.1 in the first, second, third, and fourth passages, respectively.

#### **Supplemental Figure S7**

Expression of *Alb*, *Hnf4 $\alpha$* , *C/ebp $\alpha$* , *CK19*, and *CD44* genes was examined by qPCR. At passage, total RNA was extracted from isolated cells.

#### **Supplemental Figure S8**

Incorporation of donor cells into small bile ductules in Ret/PH-treated rat livers. Fluorescent immunohistochemistry for dipeptidyl peptidase IV (DPPIV) and cytokeratin 19 (CK19) was examined. The sorted CD44<sup>+</sup> SHs (CD44) and the second passage cells cultured for 21 days without (third SHs) or with Matrigel (third SHs+MG) were transplanted. The livers were removed at 21 days after transplantation and fixed. Arrows (yellow) show DPPIV<sup>+</sup> CK19<sup>+</sup> cells.

#### **Supplemental Figure S9**

The second-passage cells ( $1 \times 10^4$  cells/well) were plated on 12-well plates coated with laminin-111, -511, -521, and Matrigel. (A) The rate of attached cells was measured. Three wells were used per experiment. The bars show SD. (B) Phase-contrast photographs of plated cells on each substrate at 3 hrs (upper row, all the same magnification) and 7 days after plating (lower row, all the same magnification).

#### **Supplemental Figure S10**

Colony formation of the passaged cells on laminin-111-coated dishes. The phase-contrast photos were taken at 28 days after subculture. The colonies of third-passage cells seemed more compact than those of second-passage cells and the growth rate of the cells may be maintained while HPPCs on Matrigel gradually reduce their proliferative ability after the third passage.

Supplemental Figure S1

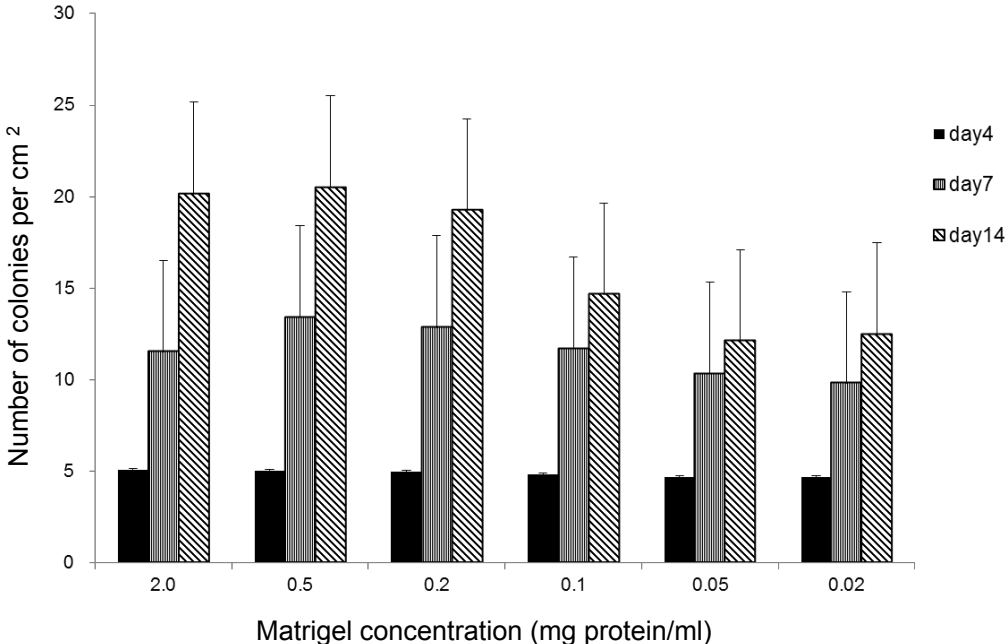

Supplemental Figure S2

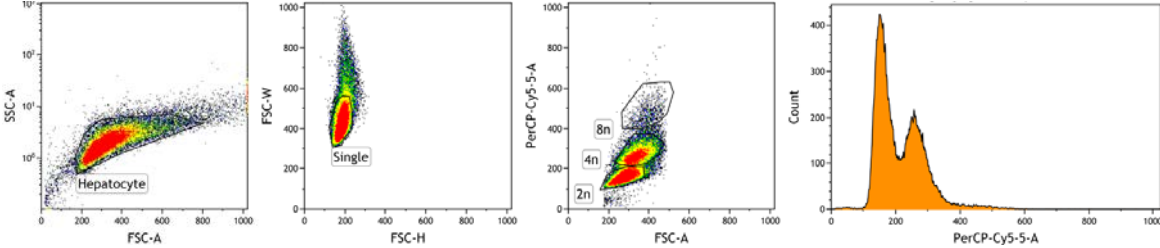

**Supplemental Figure S3**

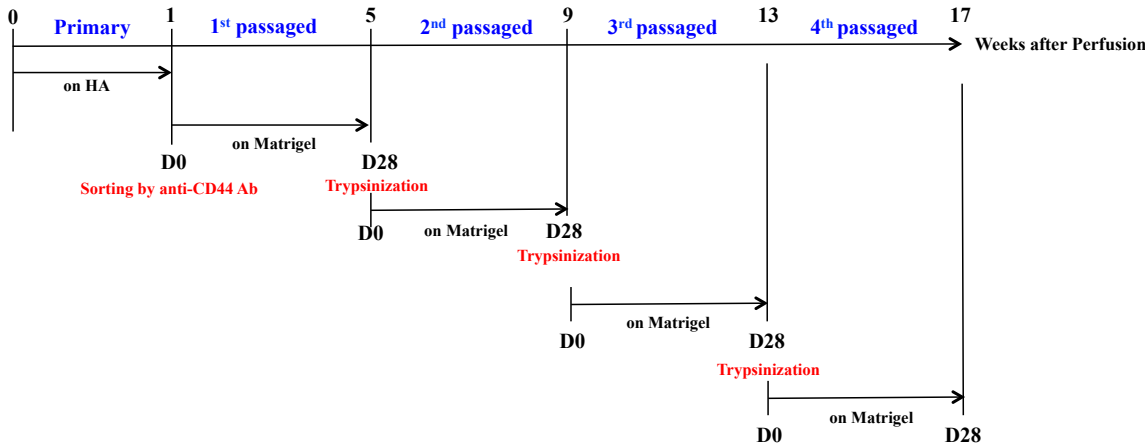

**Supplemental Figure S4**

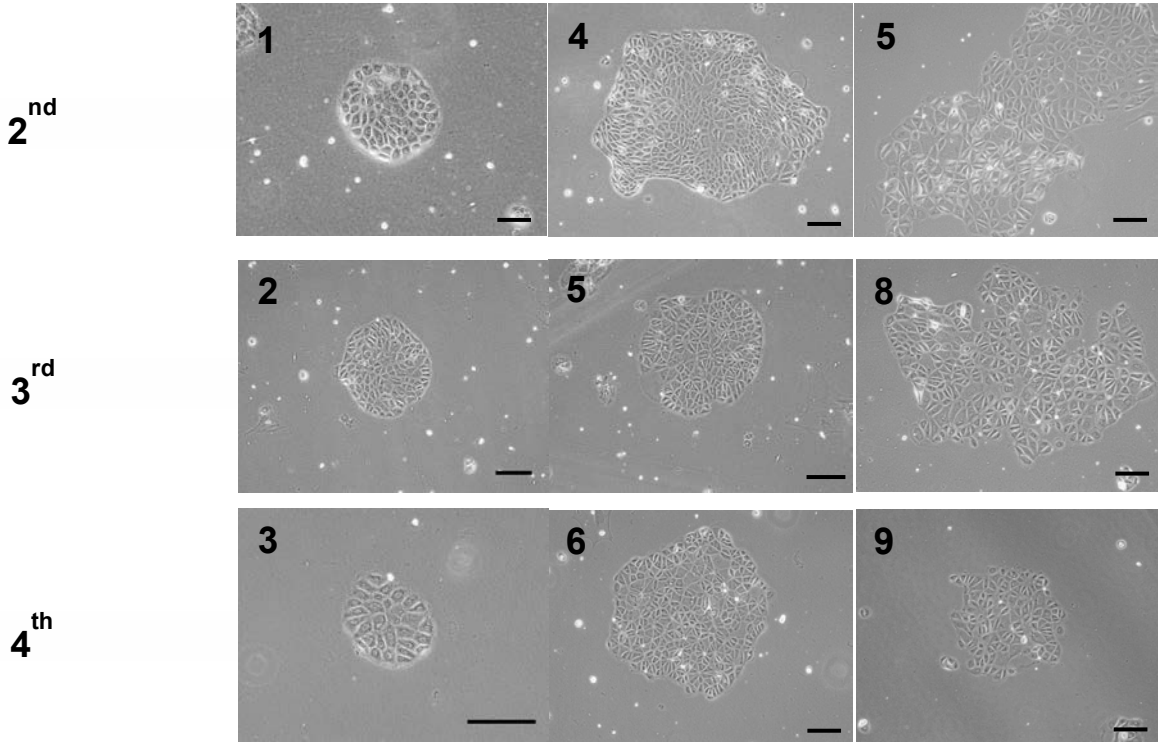

Supplemental Figure S5

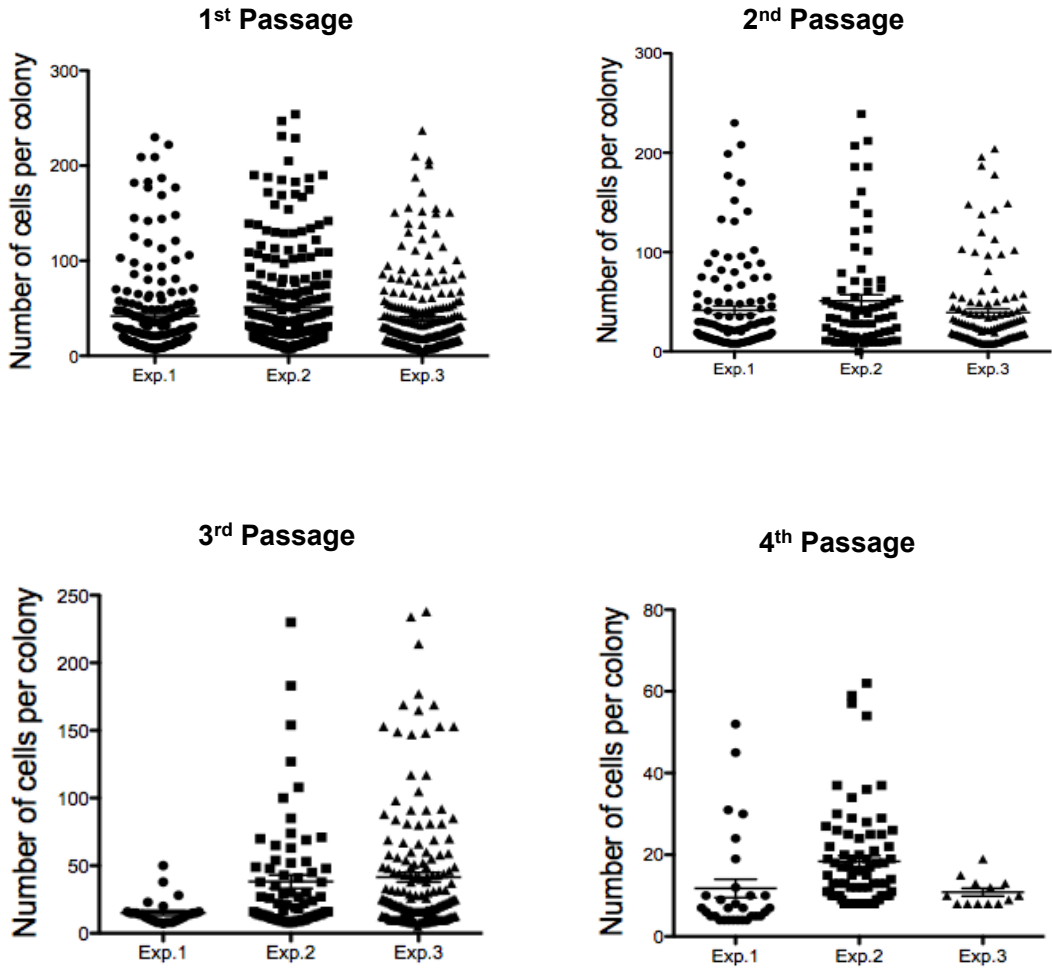

# Supplemental Figure S6

**A**

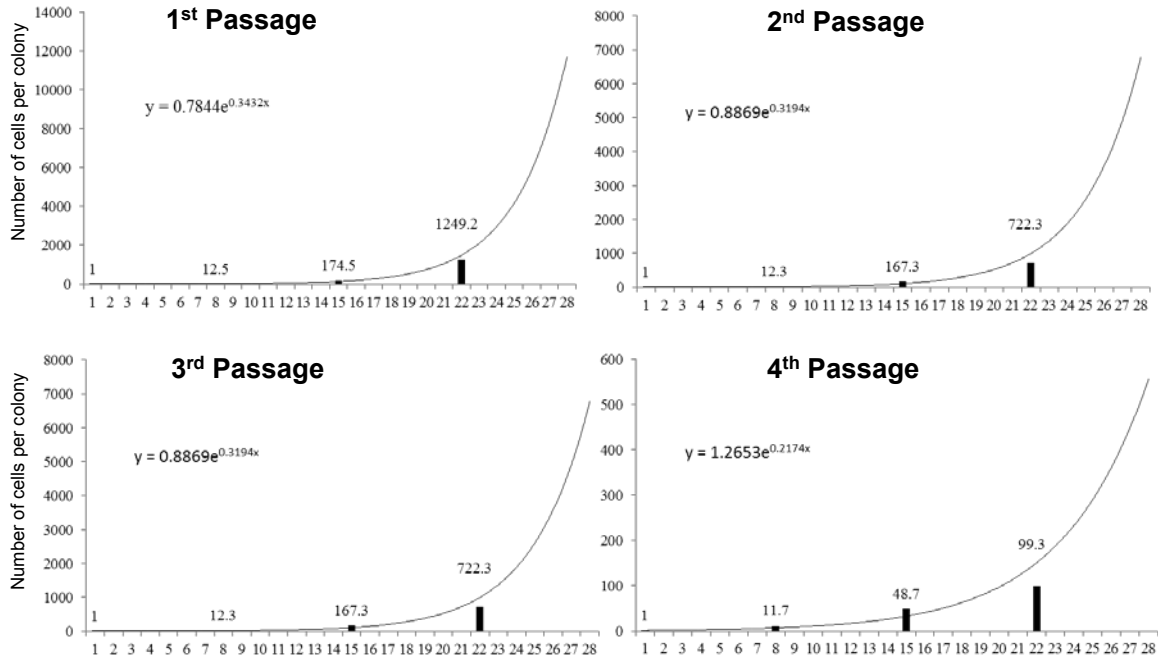

**B**

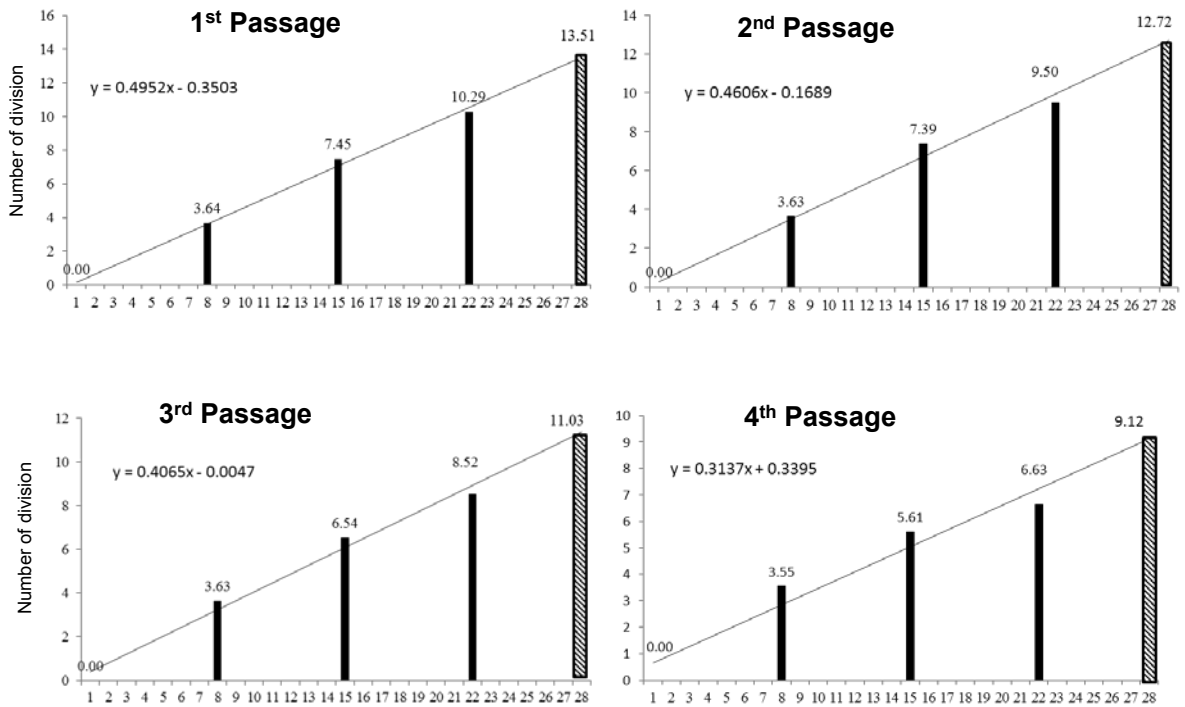

**Supplemental Figure S7**

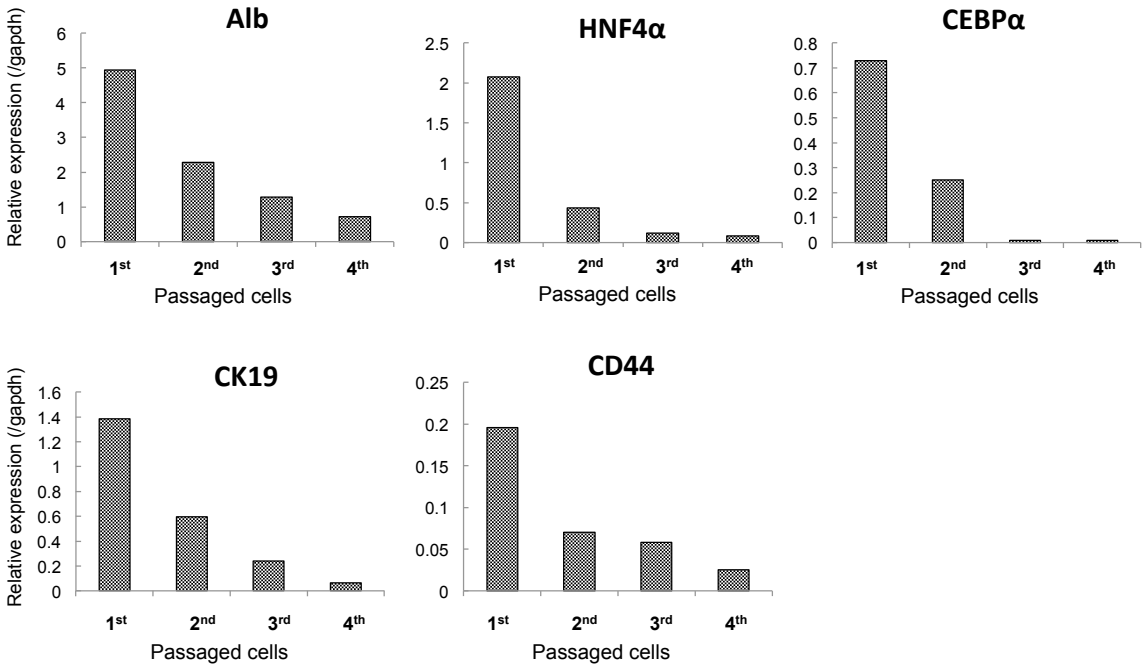

**Supplemental Figure S8**

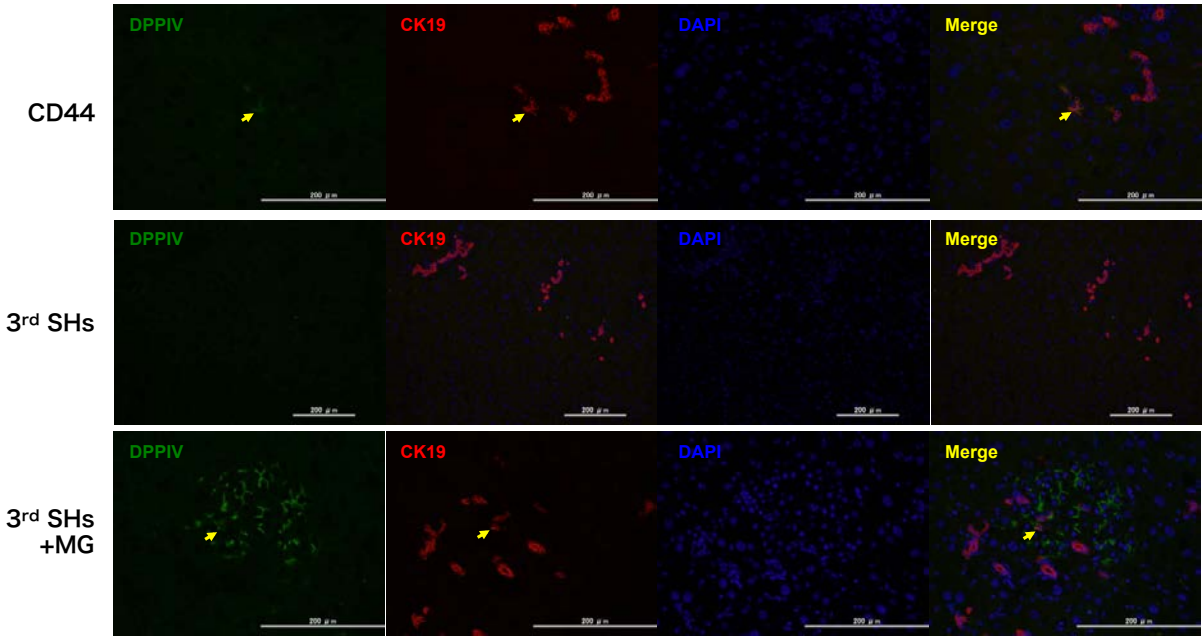



Supplemental Figure S9

A

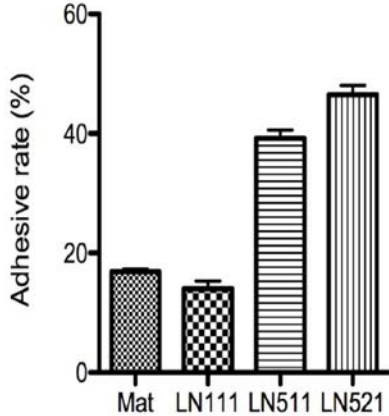

B

3hrs after plating

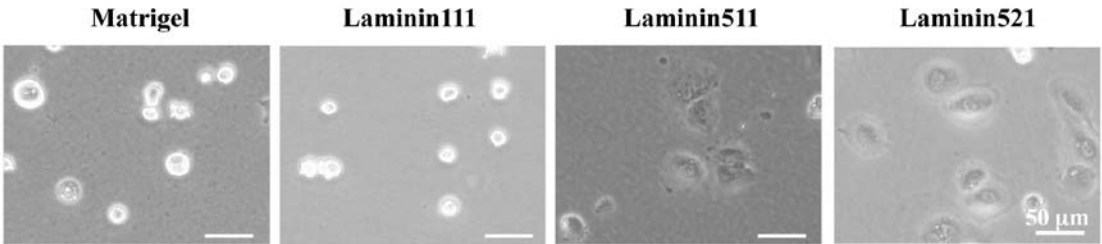

7 days after plating

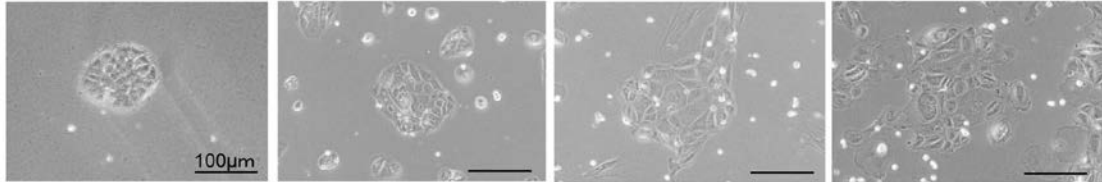

Supplemental Figure S10

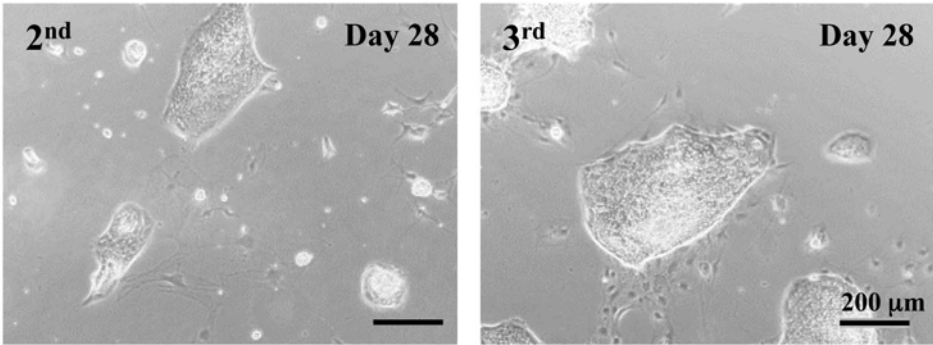

**Supplemental Table S1 List of antibodies used in the present experiment**

| <b>Antibodies</b>          | <b>Host</b> | <b>Company of Products</b>                    | <b>Dilution</b> |
|----------------------------|-------------|-----------------------------------------------|-----------------|
| CD44 standard form         | mouse       | BD Biosciences Pharmingen, Franklin Lakes, NJ | 1:1000          |
| HNF4 $\alpha$              | goat        | Santa Cruz, Santa Cruz, CA                    | 1:200           |
| C/EBP $\alpha$             | rabbit      | Santa Cruz, Santa Cruz, CA                    | 1:200           |
| BrdU                       | mouse       | DakoCytomation, Glostrup, Denmark             | 1:200           |
| Albumin                    | goat        | ICN pharmaceuticals, Costa Mesa, CA           | 1:1000          |
| CYP2B1                     | goat        | Daiichi Kagaku Yakuhin, Tokyo, Japan          | 1:200           |
| MRP2                       | mouse       | Alexis Biochemicals, San Diego, CA            | 1:200           |
| BSEP                       | goat        | Santa Cruz, Santa Cruz, CA                    | 1:200           |
| DPPIV                      | mouse       | Santa Cruz, Santa Cruz, CA                    | 1:200           |
| CK19                       | rabbit      | Generous gift from Prof. Atsushi Miyajima     | 1:500           |
| Alexa Flour 633 Phalloidin | -           | Molecular Probes, Eugene, OR                  | 1:300           |
| Mouse IgG2a+b microbeads   | rat         | Miltenyi Biotec, Bergisch Gladbach, Germany   | 1:5             |
| Alexa 488-conjugated       | donkey      | Molecular Probes, Eugene, OR                  | 1:500           |
| Alexa 555-conjugated       | donkey      | Molecular Probes, Eugene, OR                  | 1:500           |
| Alexa 594-conjugated       | donkey      | Molecular Probes, Eugene, OR                  | 1:500           |

**Supplemental Table S2 List of primers used in the present experiment**

| <b>Genes</b> | <b>Realtime-PCR Primers</b> |
|--------------|-----------------------------|
| Albumin      | Rn 01498425_m1              |
| <i>Hnf4a</i> | Rn 00573309_m1              |
| Cebpa        | Rn 00560963_s1              |
| Tat          | Rn 01640359_m1              |
| Tdo2         | Rn 00574499_m1              |
| Cyp2b1       | Rn 01457875_m1              |
| CD44s        | Rn 00681157_m1              |
| CK19         | Rn 01496867_m1              |
| G3PDH        | Rn 01775763_s1              |

**Supplemental Table S3 Efficiency of cell attachment and the growth ability of the cells in each passage**

| <b>Passages</b> | <b>Attached cells at day 1 after plating (%)</b> | <b>Total growth of attached cells at 28 days after passage (fold)</b> |
|-----------------|--------------------------------------------------|-----------------------------------------------------------------------|
| 1 <sup>st</sup> | 16.90 ± 0.50                                     | 11.80 ± 2.17                                                          |
| 2 <sup>nd</sup> | 15.13 ± 0.12                                     | 11.07 ± 4.06                                                          |
| 3 <sup>rd</sup> | 14.87 ± 0.96                                     | 4.27 ± 0.31                                                           |
| 4 <sup>th</sup> | 12.77 ± 0.58                                     | 4.4*                                                                  |

Mean ± SEM

\* n=2

At every passage the number of attached cells per field were counted at 1 day after plating and the number of the attached cells on a dish was estimated. The expansion rate (fold) of the cells was calculated by the equation that the number of recovered cells was divided by the number of attached cells. At least 3 independent experiments were performed.

**Supplemental Table S4 Ploidy pattern of cells analyzed by flow-cytometry**

| <b>Cells</b>                             | <b>2n (%)</b> | <b>4n (%)</b> | <b>8n (%)</b> |
|------------------------------------------|---------------|---------------|---------------|
| MHs                                      | 17.5 ± 2.3    | 69.3 ± 9.0    | 13.2 ± 7.4    |
| CD44 <sup>+</sup> cells                  | 34.4 ± 7.2    | 35.1 ± 14.5   | 30.0 ± 11.5   |
| 1 <sup>st</sup> passaged cells at day 28 | 52.1 ± 5.3    | 44.0 ± 4.6    | 3.8 ± 0.9     |

MHs: mature hepatocyte isolated from an adult healthy rat liver

CD44<sup>+</sup> cells: cells sorted by an anti-CD44 antibody

1<sup>st</sup> passaged cells: cells cultured for 28 days and then isolated.

**Supplemental Table S5 Colony formation of 1<sup>st</sup> passaged cells in the medium that each constituent is deleted**

| <b>Deleted substances</b> | <b>No. of colonies counted</b> | <b>No. of cells per colony</b> | <b>Labeling Index (% of BrdU<sup>+</sup> cells)</b> |
|---------------------------|--------------------------------|--------------------------------|-----------------------------------------------------|
| Control                   | 113                            | 35.4 ± 2.3                     | 29.1 ± 1.5                                          |
| Nicotinamide              | 0                              | -                              | -                                                   |
| EGF                       | 45                             | 18.1 ± 1.4*                    | 4.6 ± 0.9*                                          |
| ITS                       | 70                             | 26.7 ± 2.1*                    | 24.3 ± 1.6                                          |
| Dexamethasone             | 79                             | 25.3 ± 1.6*                    | 27.9 ± 2.1                                          |
| Asc2P                     | 101                            | 32.0 ± 2.6                     | 32.9 ± 2.0                                          |

Mean ± SEM

\* P<0.05 vs Control
